# Supplementary material for: Plasma Biomarkers of Alzheimer Disease in Women With and Without HIV
Source: PubMed Central journal article supplement (PMC10687654; doi:10.1001/jamanetworkopen.2023.44194), 2023-11-29
Supplement: jamanetwopen-e2344194-s001.pdf [file jamanetwopen-e2344194-s001.pdf]

## Supplemental Online Content

Li X, Yucel R, Clervius H, et al. Plasma Biomarkers of Alzheimer Disease in Women With and Without HIV. *JAMA Netw Open*. 2023;6(11):e2344194.  
doi:10.1001/jamanetworkopen.2023.44194

**eFigure 1.** Association Between Baseline and Follow-Up Levels of A $\beta$ 40 in the Entire Sample

**eFigure 2.** Association Between Baseline and Follow-Up Levels of A $\beta$ 42 in the Entire Sample

**eFigure 3.** Association Between Baseline and Follow-Up Levels of GFAP in the Entire Sample

**eFigure 4.** Association Between Baseline and Follow-Up Levels of NFL in the Entire Sample

**eFigure 5.** Association Between Baseline and Follow-Up Levels of T-tau in the Entire Sample

**eFigure 6.** Association Between Baseline and Follow-Up Levels of P-tau231 in the Entire Sample

This supplemental material has been provided by the authors to give readers additional information about their work.

eFigure 1. Association Between Baseline and Follow-Up Levels of Aβ40 in the Entire Sample

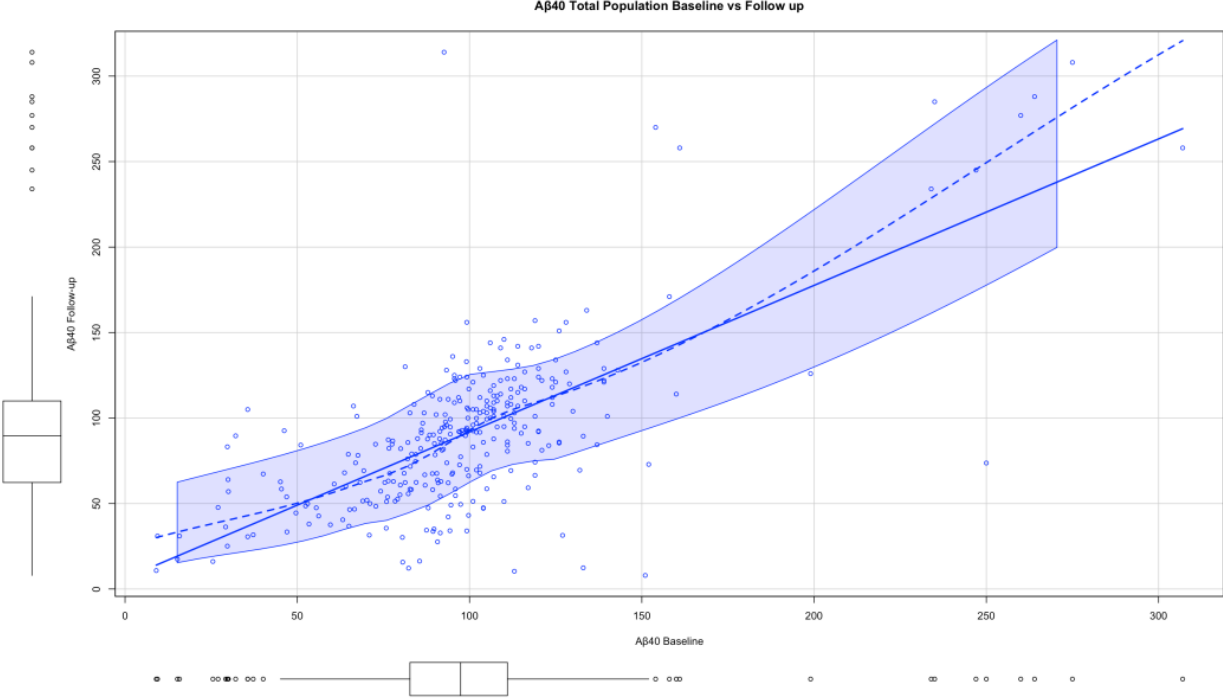

Baseline Aβ40 by follow-up Aβ40 levels (pg/mL)

eFigure 2. Association Between Baseline and Follow-Up Levels of Aβ42 in the Entire Sample

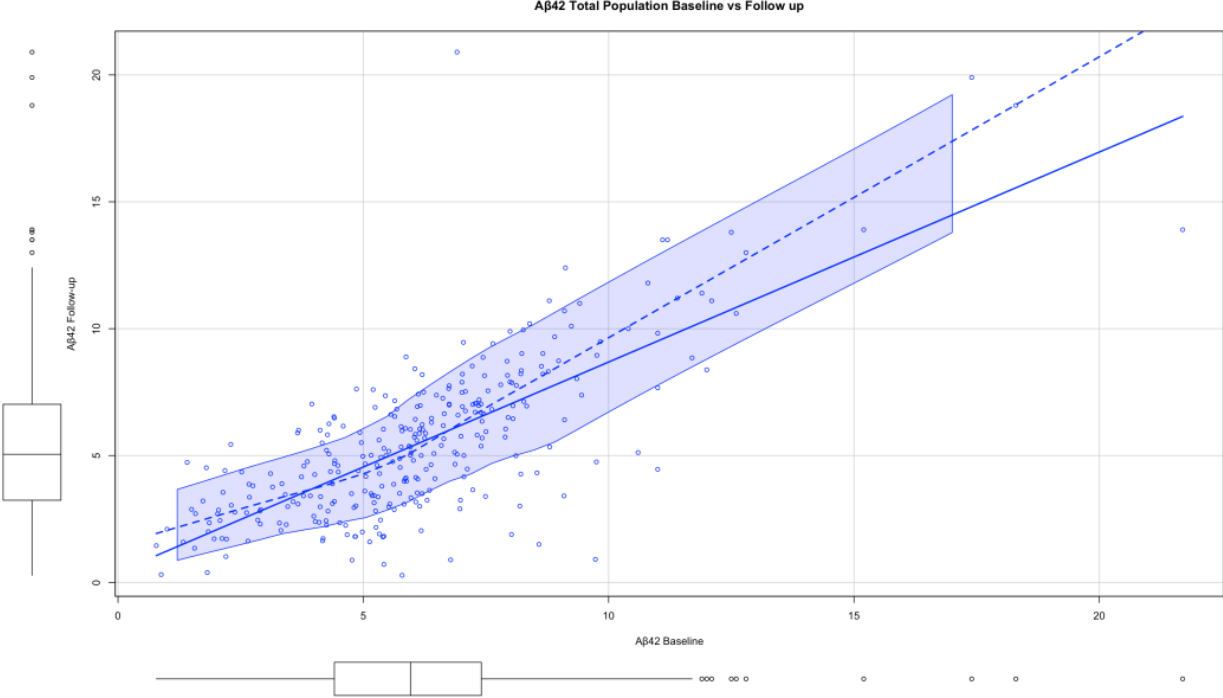

Baseline Aβ42 by Aβ42 level at follow-up (pg/mL)

eFigure 3. Association Between Baseline and Follow-Up Levels of GFAP in the Entire Sample

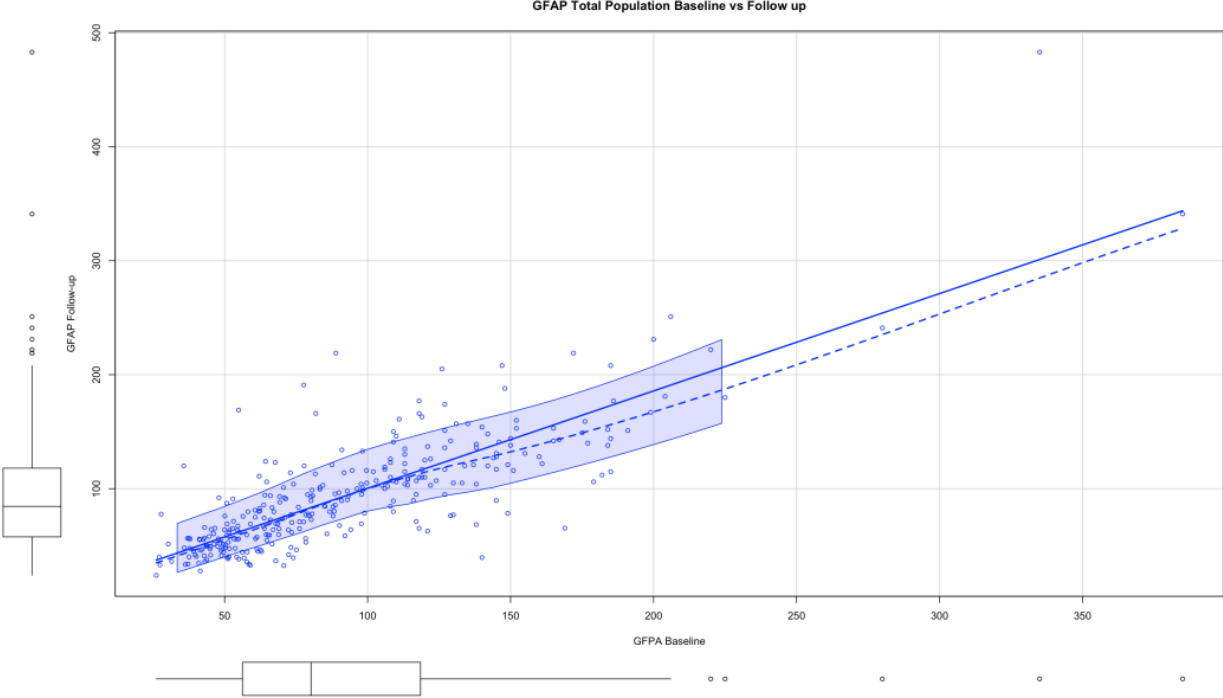

Baseline GFP by GFAP level at follow-up (pg/mL)

eFigure 4. Association Between Baseline and Follow-Up Levels of NFL in the Entire Sample

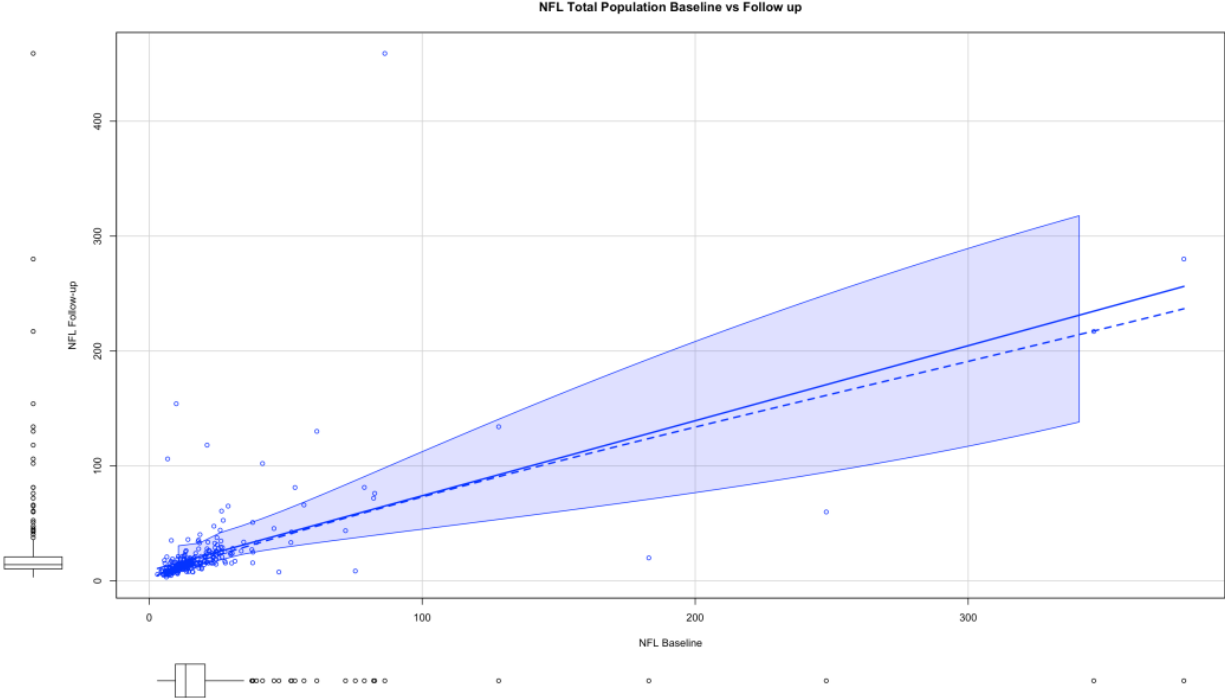

Baseline NFL by NFL at follow-up (pg/mL)

eFigure 5. Association Between Baseline and Follow-Up Levels of T-tau in the Entire Sample

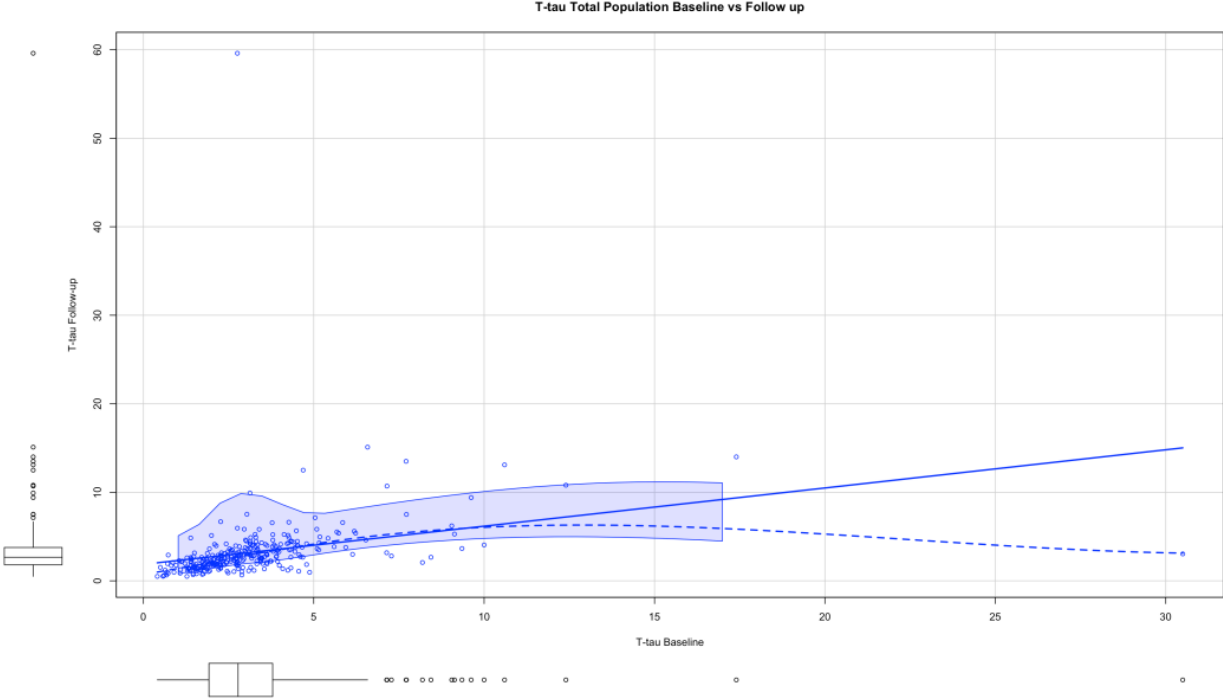

Baseline T-tau by T-tau at follow-up (pg/mL)

eFigure 6. Association Between Baseline and Follow-Up Levels of P-tau231 in the Entire Sample

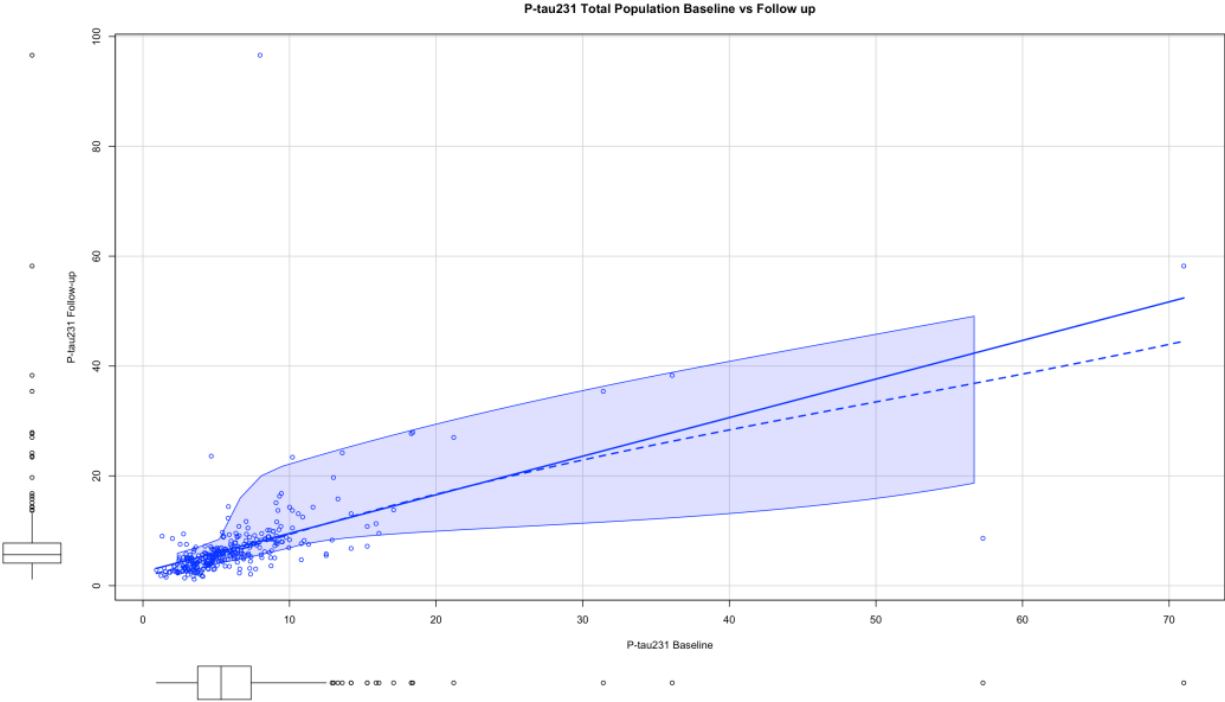

Baseline P-tau231 by P-tau231 at follow-up (pg/mL)
