# Supplementary material for: Plasma Biomarkers of Alzheimer Disease in Women With and Without HIV
Source: PubMed Central journal article supplement (PMC10687654; doi:10.1001/jamanetworkopen.2023.44194), 2023-11-29
Supplement: jamanetwopen-e2344194-s002.pdf [file jamanetwopen-e2344194-s002.pdf]

## Data Sharing Statement

Li. Plasma Biomarkers of Alzheimer Disease in Women With and Without HIV. *JAMA Netw Open*. Published November 29, 2023. doi:10.1001/jamanetworkopen.2023.44194

### Data

**Data available:** Yes

**Data types:** Deidentified participant data

**How to access data:** Data will be available upon request from the Principal Investigator upon submission of a study Concept Sheet.

**When available:** With publication

### Supporting Documents

**Document types:** Statistical/analytic code

**How to access documents:** [Deborah.Gustafson@downstate.edu](mailto:Deborah.Gustafson@downstate.edu) after following the guidelines found here: <https://statepi.jhsph.edu/mwccs/work-with-us/>

**When available:** With publication

### Additional Information

**Who can access the data:** Researchers whose proposed use of the data has been approved by MWCCS investigators.

**Types of analyses:** Specified purpose

**Mechanisms of data availability:** After approval of a proposal, i.e., an MWCCS Concept Sheet. Instructions can be found here: <https://statepi.jhsph.edu/mwccs/work-with-us/>

**Any additional restrictions:** NA
